# Supplementary material for: Low-voltage electrochemical CO2 reduction by bacterial voltage-multiplier circuits
Source: Royal Society of Chemistry journal article supplement (doi:10.1039/c2cc37986d), 2012-12-19
Supplement: c2cc37986d.pdf [file c2cc37986d.pdf]

### Supplementary Information

## Low-Voltage Electrochemical CO<sub>2</sub> Reduction by Bacterial Voltage-Multiplier Circuits

Taketo Mogi,<sup>a</sup> Takumi Ishii,<sup>a</sup> Kazuhito Hashimoto<sup>a,b\*</sup> and Ryuhei Nakamura<sup>a\*</sup>

<sup>a</sup> Department of Applied Chemistry, School of Engineering, The University of Tokyo, 7-3-1 Hongo,  
Bunkyo-ku, Tokyo 113-8656, Japan

<sup>b</sup> ERATO/JST, HASHIMOTO Light Energy Conversion Project

E-mail: nakamura@light.t.u-tokyo.ac.jp; hashimoto@light.t.u-tokyo.ac.jp

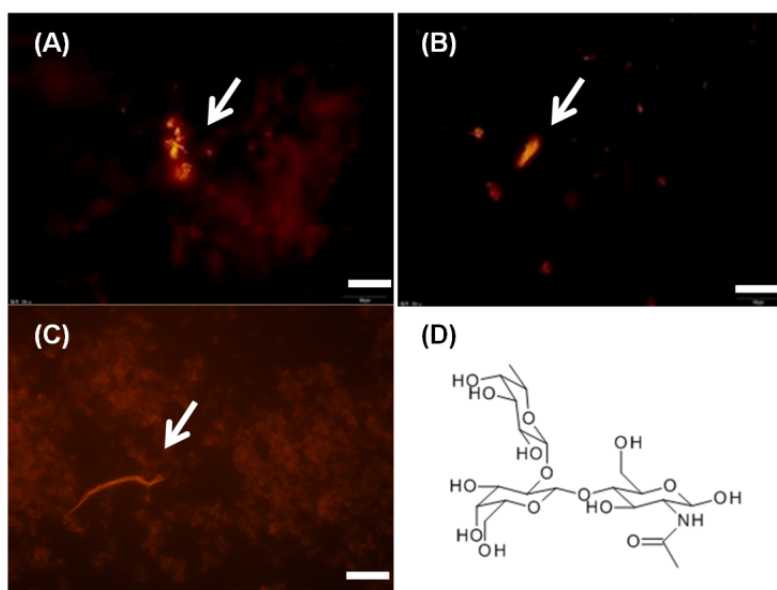

**Fig. S1** (A-C) Epifluorescence images taken from different areas of the FTO electrode surfaces after 72 h of electrochemical cultivation. UEA (*Ulex europaeus* agglutinin I) lectin was used as the indicator of *Mariprofundus* stalks. The arrows indicate stalks stained with rhodamine-conjugated UEA. The scale bar equals 10  $\mu\text{m}$ . (D) Molecular structure of the sugar chain of  $\alpha$ -L-fucose,  $\beta$ -D-galactose, and  $\beta$ -D-N-acetyl glucosamine to which UEA exhibits selectivity.
